# Supplementary material for: Photocatalytic chemoselective reduction of epoxides to alkenes along with formation of ketones in alcoholic suspensions of silver-loaded titanium(iv) oxide at room temperature without the use of reducing gases
Source: Royal Society of Chemistry journal article supplement (doi:10.1039/c3cc49340g), 2014-01-01
Supplement: c3cc49340g1.pdf [file c3cc49340g1.pdf]

Supplementary information for

**Photocatalytic chemoselective reduction of epoxides to alkenes along with  
formation of ketones in alcoholic suspensions of silver-loaded titanium(IV) oxide at  
room temperature without use of reducing gas**

## Experimental

### Preparation of TiO<sub>2</sub> and Ag/TiO<sub>2</sub>

Nanocrystalline TiO<sub>2</sub> powder was prepared using the HyCOM (hydrothermal crystallization in organic media) method at 573 K.<sup>1)</sup> Titanium(IV) butoxide and toluene were used as the starting material and solvent, respectively. The product was calcined at various temperatures for 1 h in a box furnace. The crystallinity of HyCOM-TiO<sub>2</sub> samples was improved by calcination and the samples still possessed a large specific surface area of 102 m<sup>2</sup>g<sup>-1</sup> even after calcination at 723 K. Silver (Ag, mainly 1.5 wt%) as a co-catalyst was loaded on TiO<sub>2</sub> by using the photodeposition method. TiO<sub>2</sub> powder was suspended in 5 cm<sup>3</sup> of an aqueous solution of silver nitrate in a test tube. The test tube was sealed with a rubber septum under argon (Ar) and then photoirradiated for 30 min at  $\lambda > 300$  nm by a 400-W high-pressure mercury arc (Eiko-sha, Osaka) with magnetic stirring in a water bath continuously kept at 298 K. To complete Ag deposition onto the surface of TiO<sub>2</sub>, 2-propanol (5 cm<sup>3</sup>) was injected into the mixture and the mixture was photoirradiated again for 90 min. The resulting powder was washed repeatedly with distilled water and dried for 1 h *in vacuo*.

### Photocatalytic reaction

In a typical run, Ag-TiO<sub>2</sub> (50 mg) was suspended in 5 cm<sup>3</sup> of 2-propanol containing 50  $\mu$ mol of EPB in a test tube, sealed with a rubber septum and then photoirradiated under Ar at 298 K with the same high-pressure mercury arc. The amounts of ALB and EPB were determined with an FID-type gas chromatograph equipped with a DB-1 column and acetone with a fused silica column. The amount of H<sub>2</sub> as the reduction product of proton (H<sup>+</sup>) was determined with a TCD-type gas chromatograph equipped with an MS-5A column. To obtain apparent quantum efficiency, a UV light-emitting diode (UV-LED, PJ-1505-2CA, CCS Inc., Kyoto,

maximum energy at  $\lambda = 366$  nm) was used as the light source and the light intensity was determined using a spectroradiometer USR-45D (Ushio).

## Results

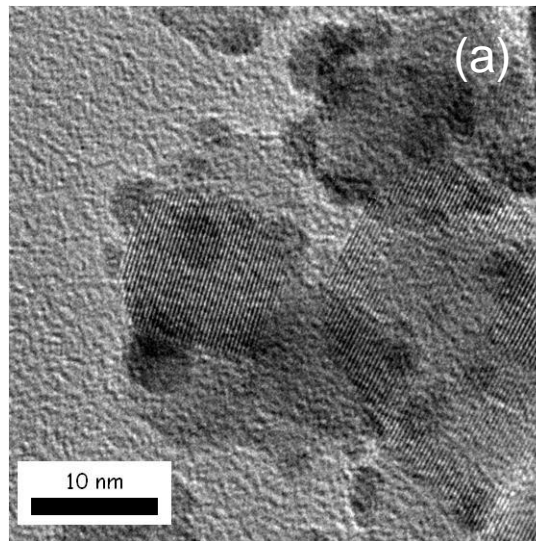

Ag-average particle size: 2.4 nm

Standard deviation: 0.85 nm

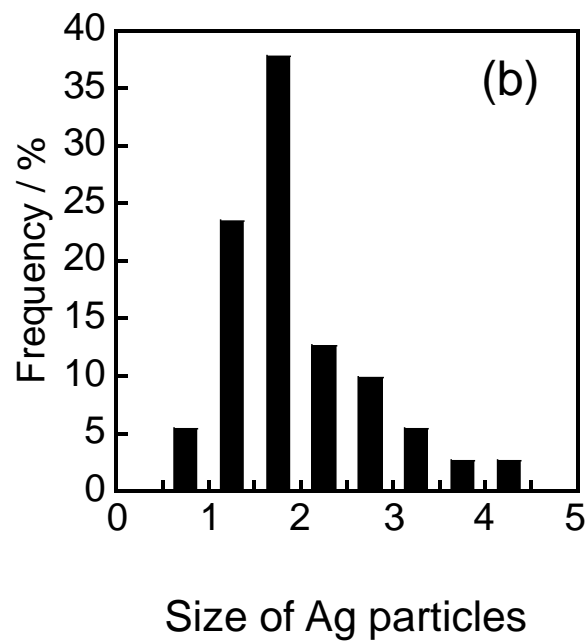

**Figure S1** (a) A transmission electron microscope image and (b) Ag-particle size distribution of 1.5 wt% Ag-TiO<sub>2</sub>.

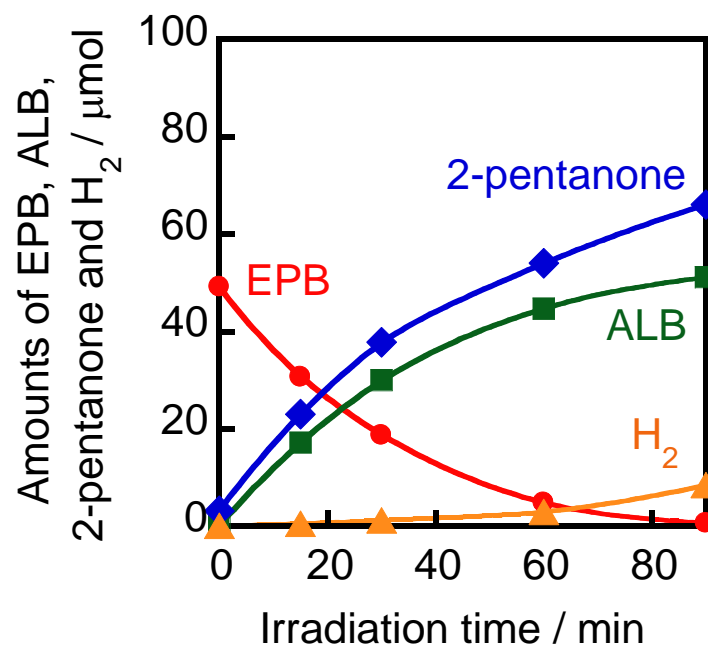

**Figure S2** Time courses of the amounts of EPB, ALB, H<sub>2</sub> and 2-pentanone in a 2-pentanol suspension of 1.5 wt% Ag-TiO<sub>2</sub> photocatalyst under deaerated conditions.
